# Supplementary material
Source: Springer Nature journal article supplement (https://www.springermedizin.de/resource/supplementary/12879_2013_2974_MOESM1_ESM.pdf/9446240)

□ Bacterial counts    ■ Spore counts

### ATCC 9689

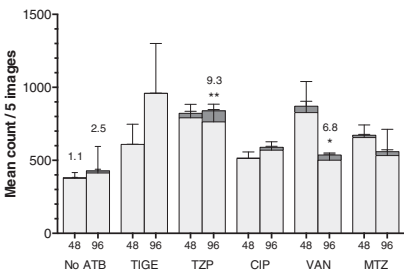

### CD630

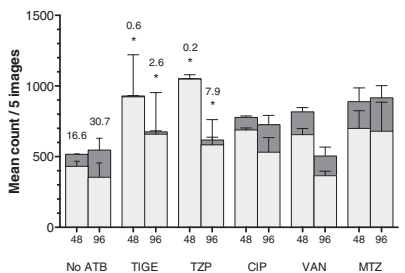

### VPI 10463

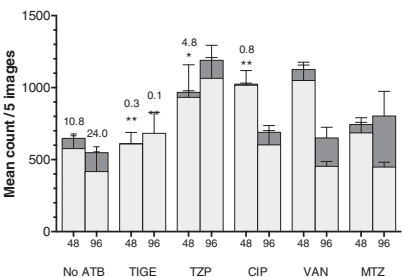

### CD274

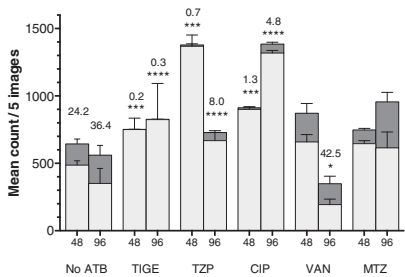

### CD385

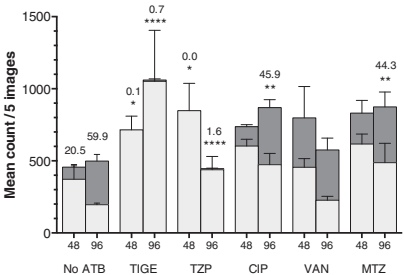

### CD386

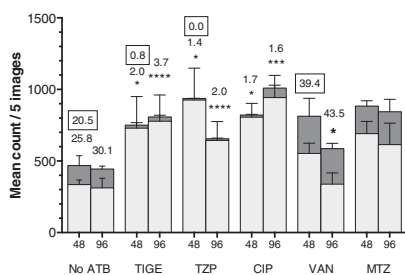

### CD390

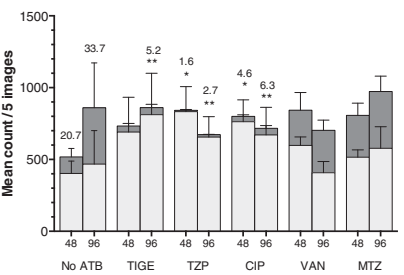

### CD392

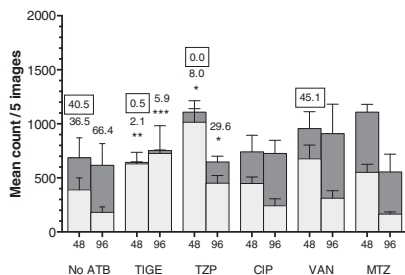

### CD398

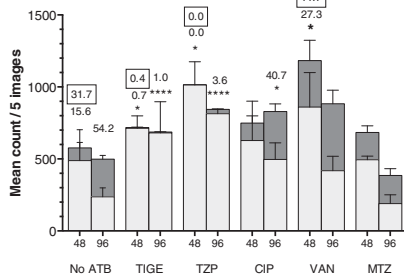

### CD400

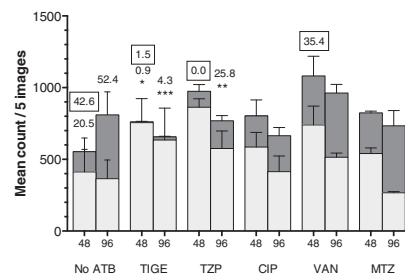

Supplement: MOESM1 [file 9446240]
